# Supplementary figures and images for: Magic State Injection on IBM Quantum Processors Above the Distillation Threshold
Source: Research Square preprint supplement (doi:10.21203/rs.3.rs-8303387/v1), 2025-12-18

**a**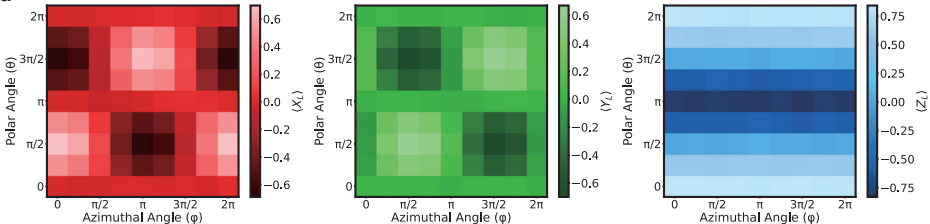**b**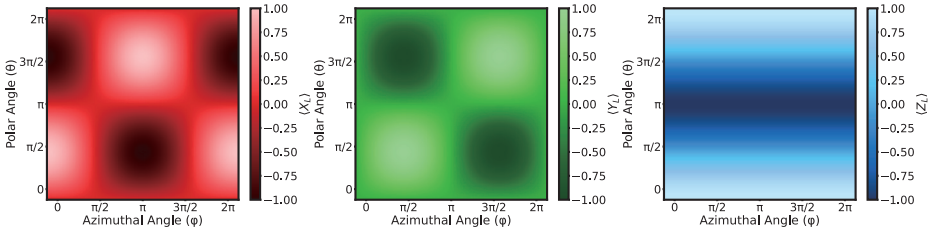

Supplement: Supplementary file 2 [file Supplementary_Figure_1.pdf › Supplementary_Figure_1.pdf]

a

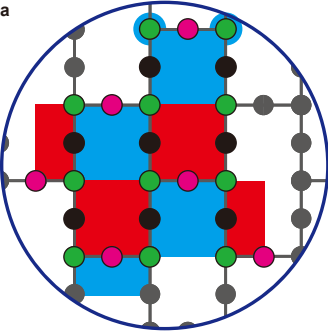

b

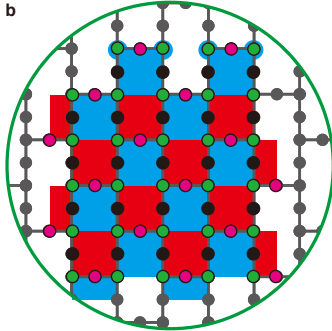

c

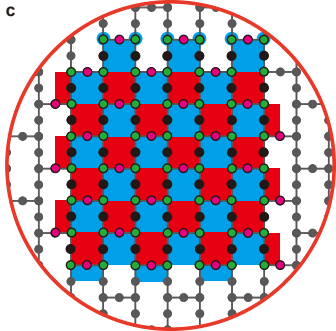

Supplement: Supplementary file 3 [file Supplementary_Figure_2.pdf › Supplementary_Figure_2.pdf]

**a**Folding  
StabilizersUnfolding  
Stabilizers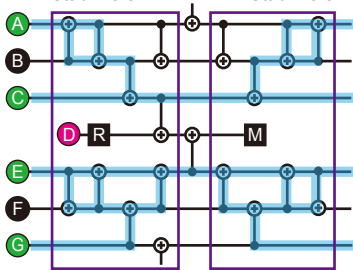**b**Folding  
StabilizersUnfolding  
Stabilizers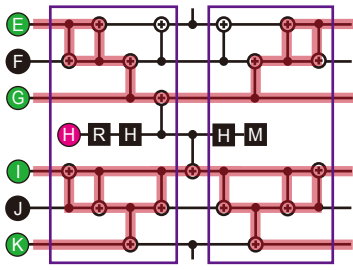

Supplement: Supplementary file 4 [file Supplementary_Figure_3.pdf › Supplementary_Figure_3.pdf]

**a**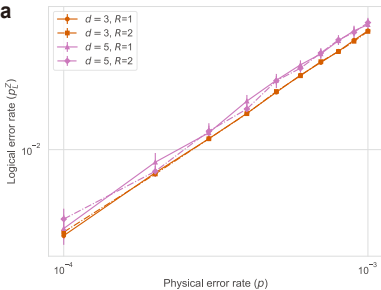**b**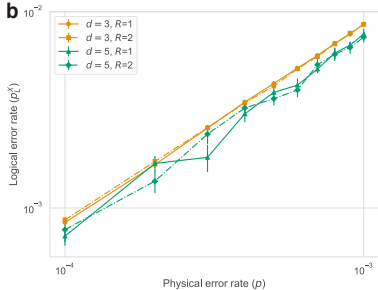

Supplement: Supplementary file 5 [file Supplementary_Figure_4.pdf › Supplementary_Figure_4.pdf]
